# Supplementary material for: Genome-wide identification and transcriptional expression analysis of superoxide dismutase (SOD) family in wheat (Triticum aestivum)
Source: PeerJ. 2019 Nov 19;7:e8062. doi: 10.7717/peerj.8062 (PMC6873880; doi:10.7717/peerj.8062)
Supplement: Table S1 [file peerj-07-8062-s001.xlsx]

## Sheet: Sheet1
Table S1 SOD genes found in Arabidopsis thaliana, Oryza sativa, and Zea mays.
Designation	Gene ID	Length(aa)	MW.(KD)	pI	Instability index	Aliphatic index	GRAVY
AtSOD1	AT1G08830.1	152	15097.7	5.24	14.73	76.32	-0.076
AtSOD2	AT2G28190.1	216	22244	6.49	27.46	86.2	-0.11
AtSOD3	AT3G10920.1	231	25443.9	8.47	29.27	89.48	-0.338
AtSOD4	AT3G56350.1	241	26891.7	6.25	31.03	91.12	-0.198
AtSOD5	AT4G25100.1	212	23790.9	6.06	24.82	77.92	-0.291
AtSOD6	AT5G18100.1	164	16941	7.16	29.19	86.83	-0.21
AtSOD7	AT5G23310.1	263	30360.4	8.62	42.33	76.73	-0.534
AtSOD8	AT5G51100.1	305	34663.9	4.88	40.52	81.21	-0.504
OsSOD1	LOC-Os03g11960	164	16517.4	6.82	22.16	81.52	-0.142
OsSOD2	LOC-Os03g22810	270	27868.1	6.25	47.83	82.67	-0.269
OsSOD3	LOC-Os04g48410	312	32229.7	5.83	31.4	89.87	0.065
OsSOD4	LOC-Os05g25850	231	24997.5	6.5	31.49	92.68	-0.129
OsSOD5	LOC-Os06g02500	391	43420.4	5.45	53.66	71.1	-0.539
OsSOD6	LOC-Os06g05110	255	29476.6	8.84	52.32	82.24	-0.413
OsSOD7	LOC-Os07g46990	152	15080.7	5.92	18.2	76.97	-0.147
OsSOD8	LOC-Os08g44770	211	21301	5.79	22.87	92.09	0.11
ZmSOD1	Zm00001d002611	218	23177.3	5.42	20.5	91.65	-0.119
ZmSOD2	Zm00001d009990	243	26435.1	6.71	28.28	91.65	-0.142
ZmSOD3	Zm00001d014632	154	17804	6.58	40.74	72.86	-0.675
ZmSOD4	Zm00001d022505	233	24922.9	5.91	27.72	75.28	-0.239
ZmSOD5	Zm00001d028232	187	20220	8.07	43.42	92.89	-0.09
ZmSOD6	Zm00001d029170	176	19549.1	6.65	54.45	79.26	-0.363
ZmSOD7	Zm00001d031908	206	20895.4	5.45	17.98	90.05	0.128
ZmSOD8	Zm00001d036135	241	27563.4	8.98	50.11	82.12	-0.468
ZmSOD9	Zm00001d037859	213	22844.2	6.71	23.8	96.71	0.029
ZmSOD10	Zm00001d045384	147	16884	5.42	43.86	86.87	-0.383
ZmSOD11	Zm00001d045538	386	42866	5.63	48.05	78.34	-0.506
ZmSOD12	Zm00001d047479	187	19722	6.48	39.39	69.89	-0.302
