# Supplementary material for: Genome-wide identification and transcriptional expression analysis of superoxide dismutase (SOD) family in wheat (Triticum aestivum)
Source: PeerJ. 2019 Nov 19;7:e8062. doi: 10.7717/peerj.8062 (PMC6873880; doi:10.7717/peerj.8062)
Supplement: Table S3 [file peerj-07-8062-s003.xlsx]

## Sheet: Sheet1
Table S3 Location TaSOD genes on Chinese Spring
Gene ID	Chr	Location	Exons
TaSOD1.1.a	Chr2A	70984323-70986598	6
TaSOD1.1b	Chr2A	70984338-70986598	6
TaSOD1.2	Chr2A	652291011-652295148	6
TaSOD1.3	Chr2B	596413052-596417727	5
TaSOD1.4	Chr2D	72170395-72172436	6
TaSOD1.5a	Chr2D	507751890-507756204	6
TaSOD1.5b	Chr2D	507752047-507756103	6
TaSOD1.6a	Chr4A	63088359-63091626	6
TaSOD1.6b	Chr4A	63088359-63091717	7
TaSOD1.7a	Chr4B	504157377-504161202	7
TaSOD1.7b	Chr4B	504157454-504160963	7
TaSOD1.8a	Chr4D	405452581-405455056	7
TaSOD1.8b	Chr4D	405452581-405456182	5
TaSOD1.9	Chr7A	363986436-364001890	5
TaSOD1.10	Chr7B	340624375-340657061	5
TaSOD1.11a	Chr7D	343959746-343970990	5
TaSOD1.11b	Chr7D	343959746-343970990	4
TaSOD2.1	Chr2A	751004614-751009403	5
TaSOD2.2	Chr2B	758592689-758597140	5
TaSOD2.3	Chr2D	619558929-619563312	5
TaSOD2.4	Chr4A	667349594-667351134	7
TaSOD2.5	Chr4A	704795701-704797806	7
TaSOD2.6	Chr7A	22886256-22888898	7
TaSOD2.7	Chr7A	54999944-55001350	6
TaSOD2.8	Chr7D	22223257-22225761	6
TaSOD2.9	Chr7D	53263870-53265248	6
