# Supplementary material for: Genome-wide identification and transcriptional expression analysis of superoxide dismutase (SOD) family in wheat (Triticum aestivum)
Source: PeerJ. 2019 Nov 19;7:e8062. doi: 10.7717/peerj.8062 (PMC6873880; doi:10.7717/peerj.8062)
Supplement: Table S4 [file peerj-07-8062-s004.xlsx]

## Sheet: Sheet1
Table S6. Functional annotation of wheat Dof genes.
#GeneID	COG_class	COG_class_annotation	GO_annotation	KEGG_annotation	KOG_class	KOG_class_annotation	Pfam_annotation	Swissprot_annotation	TrEMBL_annotation	eggNOG_class	eggNOG_class_annotation	nr_annotation
TraesCS2A01G121200	[P]	Inorganic ion transport and metabolism	Molecular Function: superoxide dismutase activity (GO:0004784);; Cellular Component: mitochondrion (GO:0005739);; Cellular Component: cytosol (GO:0005829);; Biological Process: gluconeogenesis (GO:0006094);; Biological Process: glycolytic process (GO:0006096);; Biological Process: superoxide metabolic process (GO:0006801);; Biological Process: response to oxidative stress (GO:0006979);; Biologica…	K04565|8.36953e-93|bdi:100840092|superoxide dismutase [Cu-Zn] 4A; K04565 superoxide dismutase, Cu-Zn family [EC:1.15.1.1] (A)	[P]	Inorganic ion transport and metabolism	Copper/zinc superoxide dismutase (SODC)	Superoxide dismutase [Cu-Zn] 4A GN=SODCC.3 OS=Zea mays (Maize) PE=2 SV=2	Superoxide dismutase [Cu-Zn] {ECO:0000256|RuleBase:RU000393} OS=Triticum aestivum (Wheat) PE=3 SV=1	P	Inorganic ion transport and metabolism	superoxide dismutase [Triticum aestivum]
TraesCS2A01G399000	[P]	Inorganic ion transport and metabolism	Molecular Function: superoxide dismutase activity (GO:0004784);; Cellular Component: nucleus (GO:0005634);; Cellular Component: mitochondrial inner membrane (GO:0005743);; Cellular Component: cytosol (GO:0005829);; Biological Process: cellular copper ion homeostasis (GO:0006878);; Molecular Function: zinc ion binding (GO:0008270);; Cellular Component: chloroplast stroma (GO:0009570);; Biological …	--	[P]	Inorganic ion transport and metabolism	Copper/zinc superoxide dismutase (SODC);; Heavy-metal-associated domain	Copper chaperone for superoxide dismutase, chloroplastic (Precursor) OS=Oryza sativa subsp. japonica (Rice) PE=2 SV=1	Copper chaperone for superoxide dismutase {ECO:0000313|EMBL:EMT07780.1} OS=Aegilops tauschii (Tausch's goatgrass) PE=4 SV=1	P	Inorganic ion transport and metabolism	Copper chaperone for superoxide dismutase [Aegilops tauschii]
TraesCS2B01G417000	[P]	Inorganic ion transport and metabolism	Molecular Function: superoxide dismutase activity (GO:0004784);; Cellular Component: nucleus (GO:0005634);; Cellular Component: mitochondrial inner membrane (GO:0005743);; Cellular Component: cytosol (GO:0005829);; Biological Process: cellular copper ion homeostasis (GO:0006878);; Molecular Function: zinc ion binding (GO:0008270);; Cellular Component: chloroplast stroma (GO:0009570);; Biological …	--	[P]	Inorganic ion transport and metabolism	Copper/zinc superoxide dismutase (SODC);; Heavy-metal-associated domain	Copper chaperone for superoxide dismutase, chloroplastic (Precursor) OS=Oryza sativa subsp. japonica (Rice) PE=2 SV=1	Copper chaperone for superoxide dismutase {ECO:0000313|EMBL:EMT07780.1} OS=Aegilops tauschii (Tausch's goatgrass) PE=4 SV=1	P	Inorganic ion transport and metabolism	Copper chaperone for superoxide dismutase [Aegilops tauschii]
TraesCS2D01G123300	[P]	Inorganic ion transport and metabolism	Molecular Function: superoxide dismutase activity (GO:0004784);; Molecular Function: copper ion binding (GO:0005507);; Cellular Component: mitochondrion (GO:0005739);; Cellular Component: cytosol (GO:0005829);; Biological Process: gluconeogenesis (GO:0006094);; Biological Process: glycolytic process (GO:0006096);; Molecular Function: zinc ion binding (GO:0008270);; Biological Process: response to…	K04565|1.02723e-93|bdi:100840092|superoxide dismutase [Cu-Zn] 4A; K04565 superoxide dismutase, Cu-Zn family [EC:1.15.1.1] (A)	[P]	Inorganic ion transport and metabolism	Copper/zinc superoxide dismutase (SODC)	Superoxide dismutase [Cu-Zn] 4A GN=SODCC.3 OS=Zea mays (Maize) PE=2 SV=2	Superoxide dismutase [Cu-Zn] {ECO:0000256|RuleBase:RU000393} OS=Triticum aestivum (Wheat) PE=2 SV=1	P	Inorganic ion transport and metabolism	cytosolic Cu/Zn superoxide dismutase [Triticum aestivum]
TraesCS2D01G396500	[P]	Inorganic ion transport and metabolism	Molecular Function: superoxide dismutase activity (GO:0004784);; Cellular Component: nucleus (GO:0005634);; Cellular Component: mitochondrial inner membrane (GO:0005743);; Cellular Component: cytosol (GO:0005829);; Biological Process: cellular copper ion homeostasis (GO:0006878);; Molecular Function: zinc ion binding (GO:0008270);; Cellular Component: chloroplast stroma (GO:0009570);; Biological …	--	[P]	Inorganic ion transport and metabolism	Copper/zinc superoxide dismutase (SODC);; Heavy-metal-associated domain	Copper chaperone for superoxide dismutase, chloroplastic (Precursor) OS=Oryza sativa subsp. japonica (Rice) PE=2 SV=1	Copper chaperone for superoxide dismutase {ECO:0000313|EMBL:EMT07780.1} OS=Aegilops tauschii (Tausch's goatgrass) PE=4 SV=1	P	Inorganic ion transport and metabolism	Copper chaperone for superoxide dismutase [Aegilops tauschii]
TraesCS4A01G065800	[P]	Inorganic ion transport and metabolism	Molecular Function: superoxide dismutase activity (GO:0004784);; Molecular Function: copper ion binding (GO:0005507);; Cellular Component: vacuole (GO:0005773);; Cellular Component: peroxisome (GO:0005777);; Molecular Function: zinc ion binding (GO:0008270);; Biological Process: removal of superoxide radicals (GO:0019430);; Biological Process: oxidation-reduction process (GO:0055114);;	K04565|2.21752e-91|bdi:100828127|superoxide dismutase [Cu-Zn] 2-like; K04565 superoxide dismutase, Cu-Zn family [EC:1.15.1.1] (A)	[P]	Inorganic ion transport and metabolism	Copper/zinc superoxide dismutase (SODC)	Superoxide dismutase [Cu-Zn] 2 GN=SODCC.2 OS=Mesembryanthemum crystallinum (Common ice plant) PE=2 SV=1	Superoxide dismutase [Cu-Zn] {ECO:0000256|RuleBase:RU000393} OS=Triticum aestivum (Wheat) PE=3 SV=1	P	Inorganic ion transport and metabolism	predicted protein [Hordeum vulgare subsp. vulgare]
TraesCS4B01G243200	[P]	Inorganic ion transport and metabolism	Molecular Function: superoxide dismutase activity (GO:0004784);; Molecular Function: copper ion binding (GO:0005507);; Cellular Component: vacuole (GO:0005773);; Cellular Component: peroxisome (GO:0005777);; Molecular Function: zinc ion binding (GO:0008270);; Biological Process: removal of superoxide radicals (GO:0019430);; Biological Process: oxidation-reduction process (GO:0055114);;	K04565|4.46059e-89|bdi:100828127|superoxide dismutase [Cu-Zn] 2-like; K04565 superoxide dismutase, Cu-Zn family [EC:1.15.1.1] (A)	[P]	Inorganic ion transport and metabolism	Copper/zinc superoxide dismutase (SODC)	Superoxide dismutase [Cu-Zn] 2 GN=SODCC.2 OS=Mesembryanthemum crystallinum (Common ice plant) PE=2 SV=1	Superoxide dismutase [Cu-Zn] {ECO:0000256|RuleBase:RU000393} OS=Triticum aestivum (Wheat) PE=3 SV=1	P	Inorganic ion transport and metabolism	predicted protein [Hordeum vulgare subsp. vulgare]
TraesCS4D01G242800	[P]	Inorganic ion transport and metabolism	Molecular Function: superoxide dismutase activity (GO:0004784);; Molecular Function: copper ion binding (GO:0005507);; Cellular Component: vacuole (GO:0005773);; Cellular Component: peroxisome (GO:0005777);; Molecular Function: zinc ion binding (GO:0008270);; Biological Process: removal of superoxide radicals (GO:0019430);; Biological Process: oxidation-reduction process (GO:0055114);;	K04565|1.22752e-82|bdi:100828127|superoxide dismutase [Cu-Zn] 2-like; K04565 superoxide dismutase, Cu-Zn family [EC:1.15.1.1] (A)	[P]	Inorganic ion transport and metabolism	Copper/zinc superoxide dismutase (SODC)	Superoxide dismutase [Cu-Zn] 2 GN=SODCC.2 OS=Mesembryanthemum crystallinum (Common ice plant) PE=2 SV=1	Superoxide dismutase [Cu-Zn] {ECO:0000256|RuleBase:RU000393} OS=Aegilops tauschii (Tausch's goatgrass) PE=3 SV=1	P	Inorganic ion transport and metabolism	Superoxide dismutase (Cu-Zn) 2 [Aegilops tauschii]
TraesCS7A01G292100	[P]	Inorganic ion transport and metabolism	Molecular Function: superoxide dismutase activity (GO:0004784);; Biological Process: superoxide metabolic process (GO:0006801);; Biological Process: response to oxidative stress (GO:0006979);; Biological Process: toxin catabolic process (GO:0009407);; Biological Process: response to light stimulus (GO:0009416);; Cellular Component: chloroplast stroma (GO:0009570);; Cellular Component: thylakoid (…	K04565|1.38939e-94|bdi:100831056|superoxide dismutase [Cu-Zn], chloroplastic; K04565 superoxide dismutase, Cu-Zn family [EC:1.15.1.1] (A)	[P]	Inorganic ion transport and metabolism	Copper/zinc superoxide dismutase (SODC)	Superoxide dismutase [Cu-Zn], chloroplastic (Precursor) OS=Oryza sativa subsp. japonica (Rice) PE=1 SV=1	Superoxide dismutase [Cu-Zn] {ECO:0000256|RuleBase:RU000393} OS=Triticum aestivum (Wheat) PE=2 SV=1	P	Inorganic ion transport and metabolism	Cu/Zn superoxide dismutase [Triticum aestivum]
TraesCS7B01G197300	[P]	Inorganic ion transport and metabolism	Molecular Function: superoxide dismutase activity (GO:0004784);; Molecular Function: copper ion binding (GO:0005507);; Molecular Function: zinc ion binding (GO:0008270);; Biological Process: toxin catabolic process (GO:0009407);; Biological Process: response to light stimulus (GO:0009416);; Cellular Component: chloroplast stroma (GO:0009570);; Cellular Component: thylakoid (GO:0009579);; Biologic…	K04565|1.00206e-94|bdi:100831056|superoxide dismutase [Cu-Zn], chloroplastic; K04565 superoxide dismutase, Cu-Zn family [EC:1.15.1.1] (A)	[P]	Inorganic ion transport and metabolism	Copper/zinc superoxide dismutase (SODC)	Superoxide dismutase [Cu-Zn], chloroplastic (Precursor) OS=Oryza sativa subsp. japonica (Rice) PE=1 SV=1	Superoxide dismutase [Cu-Zn] {ECO:0000256|RuleBase:RU000393} OS=Triticum aestivum (Wheat) PE=2 SV=1	P	Inorganic ion transport and metabolism	Cu/Zn superoxide dismutase [Triticum aestivum]
TraesCS7D01G290700	[P]	Inorganic ion transport and metabolism	Molecular Function: superoxide dismutase activity (GO:0004784);; Molecular Function: copper ion binding (GO:0005507);; Molecular Function: zinc ion binding (GO:0008270);; Biological Process: toxin catabolic process (GO:0009407);; Biological Process: response to light stimulus (GO:0009416);; Cellular Component: chloroplast stroma (GO:0009570);; Cellular Component: thylakoid (GO:0009579);; Biologic…	K04565|3.8308e-93|bdi:100831056|superoxide dismutase [Cu-Zn], chloroplastic; K04565 superoxide dismutase, Cu-Zn family [EC:1.15.1.1] (A)	[P]	Inorganic ion transport and metabolism	Copper/zinc superoxide dismutase (SODC)	Superoxide dismutase [Cu-Zn], chloroplastic (Precursor) OS=Oryza sativa subsp. japonica (Rice) PE=1 SV=1	Superoxide dismutase [Cu-Zn] {ECO:0000256|RuleBase:RU000393} OS=Triticum aestivum (Wheat) PE=2 SV=1	P	Inorganic ion transport and metabolism	Cu/Zn superoxide dismutase [Triticum aestivum]
TraesCS2A01G537100	[P]	Inorganic ion transport and metabolism	Molecular Function: superoxide dismutase activity (GO:0004784);; Molecular Function: copper ion binding (GO:0005507);; Cellular Component: mitochondrial matrix (GO:0005759);; Biological Process: superoxide metabolic process (GO:0006801);; Biological Process: response to salt stress (GO:0009651);; Biological Process: embryo development ending in seed dormancy (GO:0009793);; Biological Process: res…	K04564|7.38906e-137|bdi:100825602|superoxide dismutase [Mn] 3.1, mitochondrial; K04564 superoxide dismutase, Fe-Mn family [EC:1.15.1.1] (A)	[P]	Inorganic ion transport and metabolism	Iron/manganese superoxide dismutases, C-terminal domain;; Iron/manganese superoxide dismutases, alpha-hairpin domain	Superoxide dismutase [Mn] 3.1, mitochondrial (Precursor) GN=SODA.4 OS=Zea mays (Maize) PE=2 SV=1	Superoxide dismutase {ECO:0000256|RuleBase:RU000414} OS=Triticum aestivum (Wheat) PE=2 SV=1	P	Inorganic ion transport and metabolism	manganese superoxide dismutase [Triticum aestivum]
TraesCS2B01G567600	[P]	Inorganic ion transport and metabolism	Molecular Function: superoxide dismutase activity (GO:0004784);; Molecular Function: copper ion binding (GO:0005507);; Cellular Component: mitochondrial matrix (GO:0005759);; Biological Process: superoxide metabolic process (GO:0006801);; Biological Process: response to salt stress (GO:0009651);; Biological Process: embryo development ending in seed dormancy (GO:0009793);; Biological Process: res…	K04564|6.59264e-136|bdi:100825602|superoxide dismutase [Mn] 3.1, mitochondrial; K04564 superoxide dismutase, Fe-Mn family [EC:1.15.1.1] (A)	[P]	Inorganic ion transport and metabolism	Iron/manganese superoxide dismutases, C-terminal domain;; Iron/manganese superoxide dismutases, alpha-hairpin domain	Superoxide dismutase [Mn] 3.1, mitochondrial (Precursor) GN=SODA.4 OS=Zea mays (Maize) PE=2 SV=1	Superoxide dismutase {ECO:0000256|RuleBase:RU000414} OS=Triticum aestivum (Wheat) PE=2 SV=1	P	Inorganic ion transport and metabolism	manganese superoxide dismutase [Triticum aestivum]
TraesCS2D01G538300	[P]	Inorganic ion transport and metabolism	Molecular Function: superoxide dismutase activity (GO:0004784);; Molecular Function: copper ion binding (GO:0005507);; Cellular Component: mitochondrial matrix (GO:0005759);; Biological Process: superoxide metabolic process (GO:0006801);; Biological Process: response to salt stress (GO:0009651);; Biological Process: embryo development ending in seed dormancy (GO:0009793);; Biological Process: res…	K04564|7.47022e-137|bdi:100825602|superoxide dismutase [Mn] 3.1, mitochondrial; K04564 superoxide dismutase, Fe-Mn family [EC:1.15.1.1] (A)	[P]	Inorganic ion transport and metabolism	Iron/manganese superoxide dismutases, C-terminal domain;; Iron/manganese superoxide dismutases, alpha-hairpin domain	Superoxide dismutase [Mn] 3.1, mitochondrial (Precursor) GN=SODA.4 OS=Zea mays (Maize) PE=2 SV=1	Superoxide dismutase {ECO:0000256|RuleBase:RU000414} OS=Triticum aestivum (Wheat) PE=2 SV=1	P	Inorganic ion transport and metabolism	manganese superoxide dismutase [Triticum aestivum]
TraesCS4A01G390300	[P]	Inorganic ion transport and metabolism	Molecular Function: superoxide dismutase activity (GO:0004784);; Cellular Component: thylakoid (GO:0009579);; Biological Process: removal of superoxide radicals (GO:0019430);; Cellular Component: chloroplast nucleoid (GO:0042644);; Molecular Function: metal ion binding (GO:0046872);; Biological Process: oxidation-reduction process (GO:0055114);;	--	[P]	Inorganic ion transport and metabolism	Iron/manganese superoxide dismutases, C-terminal domain;; Iron/manganese superoxide dismutases, alpha-hairpin domain	Superoxide dismutase [Fe] 2, chloroplastic (Precursor) OS=Oryza sativa subsp. japonica (Rice) PE=2 SV=1	Superoxide dismutase {ECO:0000256|RuleBase:RU000414} (Fragment) OS=Triticum aestivum (Wheat) PE=2 SV=1	P	Inorganic ion transport and metabolism	iron-superoxide dismutase, partial [Triticum aestivum]
TraesCS4A01G434000	[P]	Inorganic ion transport and metabolism	Molecular Function: superoxide dismutase activity (GO:0004784);; Molecular Function: protein binding (GO:0005515);; Biological Process: rRNA processing (GO:0006364);; Biological Process: tRNA metabolic process (GO:0006399);; Biological Process: superoxide metabolic process (GO:0006801);; Biological Process: response to UV (GO:0009411);; Cellular Component: thylakoid (GO:0009579);; Biological Proc…	K04564|0|bdi:100838250|superoxide dismutase [Fe] 1, chloroplastic-like; K04564 superoxide dismutase, Fe-Mn family [EC:1.15.1.1] (A)	[P]	Inorganic ion transport and metabolism	Iron/manganese superoxide dismutases, C-terminal domain;; Iron/manganese superoxide dismutases, alpha-hairpin domain	Superoxide dismutase [Fe] 1, chloroplastic (Precursor) OS=Oryza sativa subsp. japonica (Rice) PE=2 SV=1	Superoxide dismutase {ECO:0000256|RuleBase:RU000414} OS=Triticum aestivum (Wheat) PE=4 SV=1	P	Inorganic ion transport and metabolism	Superoxide dismutase [Fe], chloroplastic [Triticum urartu]
TraesCS7A01G048600	[P]	Inorganic ion transport and metabolism	Molecular Function: superoxide dismutase activity (GO:0004784);; Molecular Function: protein binding (GO:0005515);; Biological Process: rRNA processing (GO:0006364);; Biological Process: tRNA metabolic process (GO:0006399);; Biological Process: superoxide metabolic process (GO:0006801);; Biological Process: response to UV (GO:0009411);; Cellular Component: thylakoid (GO:0009579);; Biological Proc…	K04564|0|bdi:100838250|superoxide dismutase [Fe] 1, chloroplastic-like; K04564 superoxide dismutase, Fe-Mn family [EC:1.15.1.1] (A)	[P]	Inorganic ion transport and metabolism	Iron/manganese superoxide dismutases, C-terminal domain;; Iron/manganese superoxide dismutases, alpha-hairpin domain	Superoxide dismutase [Fe] 1, chloroplastic (Precursor) OS=Oryza sativa subsp. japonica (Rice) PE=2 SV=1	Superoxide dismutase {ECO:0000256|RuleBase:RU000414} (Fragment) OS=Triticum aestivum (Wheat) PE=4 SV=1	P	Inorganic ion transport and metabolism	Superoxide dismutase [Fe], chloroplastic [Triticum urartu]
TraesCS7A01G090400	[P]	Inorganic ion transport and metabolism	Molecular Function: superoxide dismutase activity (GO:0004784);; Cellular Component: thylakoid (GO:0009579);; Biological Process: removal of superoxide radicals (GO:0019430);; Cellular Component: chloroplast nucleoid (GO:0042644);; Molecular Function: metal ion binding (GO:0046872);; Biological Process: oxidation-reduction process (GO:0055114);;	--	[P]	Inorganic ion transport and metabolism	Iron/manganese superoxide dismutases, C-terminal domain;; Iron/manganese superoxide dismutases, alpha-hairpin domain	Superoxide dismutase [Fe] 2, chloroplastic (Precursor) OS=Oryza sativa subsp. japonica (Rice) PE=2 SV=1	Superoxide dismutase {ECO:0000256|RuleBase:RU000414} (Fragment) OS=Triticum aestivum (Wheat) PE=2 SV=1	P	Inorganic ion transport and metabolism	iron-superoxide dismutase, partial [Triticum aestivum]
TraesCS7D01G043000	[P]	Inorganic ion transport and metabolism	Molecular Function: superoxide dismutase activity (GO:0004784);; Molecular Function: protein binding (GO:0005515);; Biological Process: rRNA processing (GO:0006364);; Biological Process: tRNA metabolic process (GO:0006399);; Biological Process: superoxide metabolic process (GO:0006801);; Biological Process: response to UV (GO:0009411);; Cellular Component: thylakoid (GO:0009579);; Biological Proc…	K04564|0|bdi:100838250|superoxide dismutase [Fe] 1, chloroplastic-like; K04564 superoxide dismutase, Fe-Mn family [EC:1.15.1.1] (A)	[P]	Inorganic ion transport and metabolism	Iron/manganese superoxide dismutases, C-terminal domain;; Iron/manganese superoxide dismutases, alpha-hairpin domain	Superoxide dismutase [Fe] 1, chloroplastic (Precursor) OS=Oryza sativa subsp. japonica (Rice) PE=2 SV=1	Superoxide dismutase {ECO:0000256|RuleBase:RU000414} (Fragment) OS=Triticum aestivum (Wheat) PE=4 SV=1	P	Inorganic ion transport and metabolism	Superoxide dismutase [Fe], chloroplastic [Triticum urartu]
TraesCS7D01G086400	[P]	Inorganic ion transport and metabolism	Molecular Function: superoxide dismutase activity (GO:0004784);; Cellular Component: thylakoid (GO:0009579);; Biological Process: removal of superoxide radicals (GO:0019430);; Cellular Component: chloroplast nucleoid (GO:0042644);; Molecular Function: metal ion binding (GO:0046872);; Biological Process: oxidation-reduction process (GO:0055114);;	--	[P]	Inorganic ion transport and metabolism	Iron/manganese superoxide dismutases, C-terminal domain;; Iron/manganese superoxide dismutases, alpha-hairpin domain	Superoxide dismutase [Fe] 2, chloroplastic (Precursor) OS=Oryza sativa subsp. japonica (Rice) PE=2 SV=1	Superoxide dismutase {ECO:0000256|RuleBase:RU000414} OS=Triticum aestivum (Wheat) PE=4 SV=1	P	Inorganic ion transport and metabolism	predicted protein [Hordeum vulgare subsp. vulgare]
